# Supplementary material
Source: Springer Nature journal article supplement (https://www.springermedizin.de/resource/supplementary/12958_2014_1216_MOESM3_ESM.pdf/9567048)

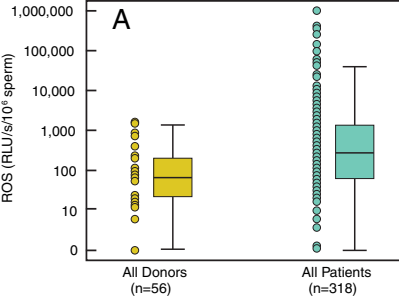

All Donors vs. All Patients

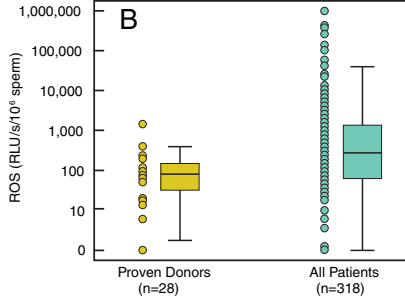

Proven Donors vs. All Patients

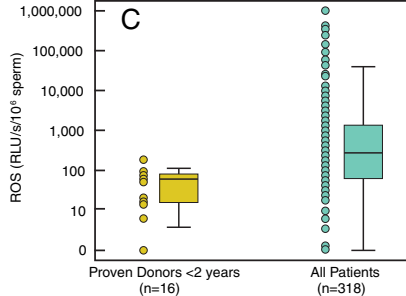

Proven Donors <2 years vs. All Patients

Supplement: MOESM3 [file 9567048]
